# Supplementary figures and images for: Nonlinear Optical Properties in an Epitaxial YbFe2O4 Film Probed by Second Harmonic and Terahertz Generation
Source: MDPI journal article supplement (doi:10.3390/ma16051989), 2023-02-28

## Supplementary Materials

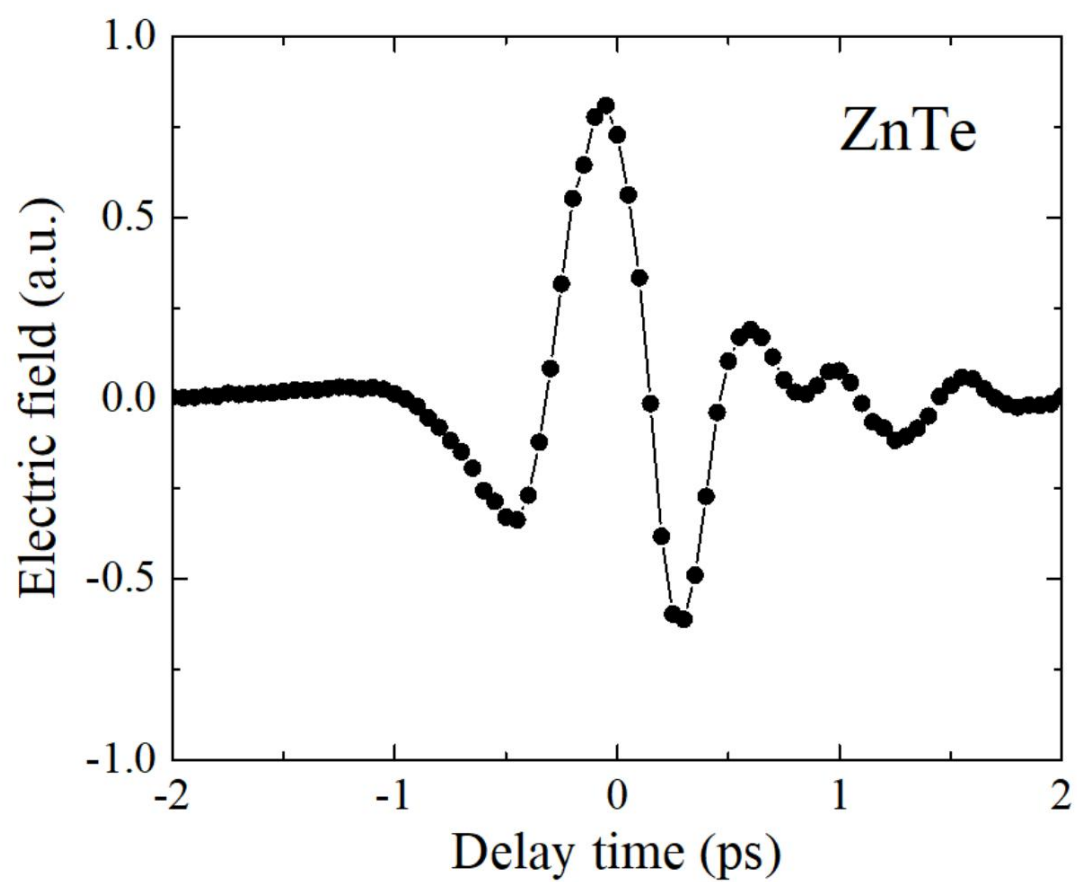

Figure S1: Waveform of the electric field radiated from the bulk ZnTe.

Supplement: s1 [file s1]
